# Supplementary material
Source: PubMed Central journal article supplement (PMC3048102)
Supplement: 1009043108_pnas.201009043SI.pdf [file 1009043108_pnas.201009043SI.pdf]

# Supporting Information

Wu et al. 10.1073/pnas.1009043108

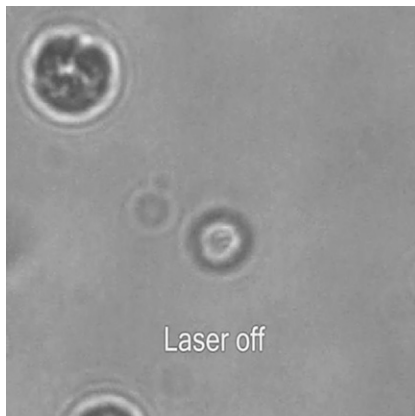

**Movie S1.** A single *C. reinhardtii* cell is optically trapped by a 785-nm laser. No loss of activity of the biflagellate *C. reinhardtii* cell observed after an extended 10-min exposure to the above-normal laser power in the laser trap proves the laser-trapping Raman spectroscopic system has little damage to microalgae cells. This version is in .mov format.

[Movie S1](#)

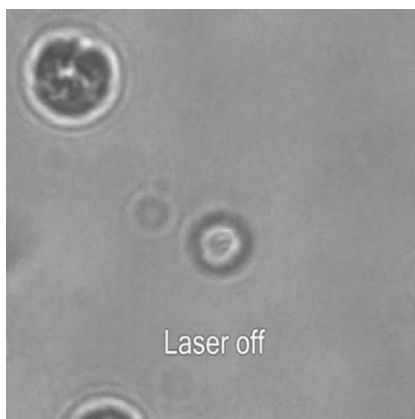

**Movie S2.** A single *C. reinhardtii* cell is optically trapped by a 785-nm laser. No loss of activity of the biflagellate *C. reinhardtii* cell observed after an extended 10-min exposure to the above-normal laser power in the laser trap proves the laser-trapping Raman spectroscopic system has little damage to microalgae cells. This version is in .wmv format.

[Movie S2](#)

## Other Supporting Information

[SI Appendix \(PDF\)](#)
